# Supplementary material for: Enhancing studies of the connectome in autism using the autism brain imaging data exchange II
Source: PubMed Central journal article supplement (PMC5349246; doi:10.1038/sdata.2017.10), 2017-03-14
Supplement: sdata201710-s2.pdf [file sdata201710-s2.pdf]

## **Supplementary Information**

**Enhancing studies of the connectome in autism using the Autism Brain Imaging Data Exchange II**

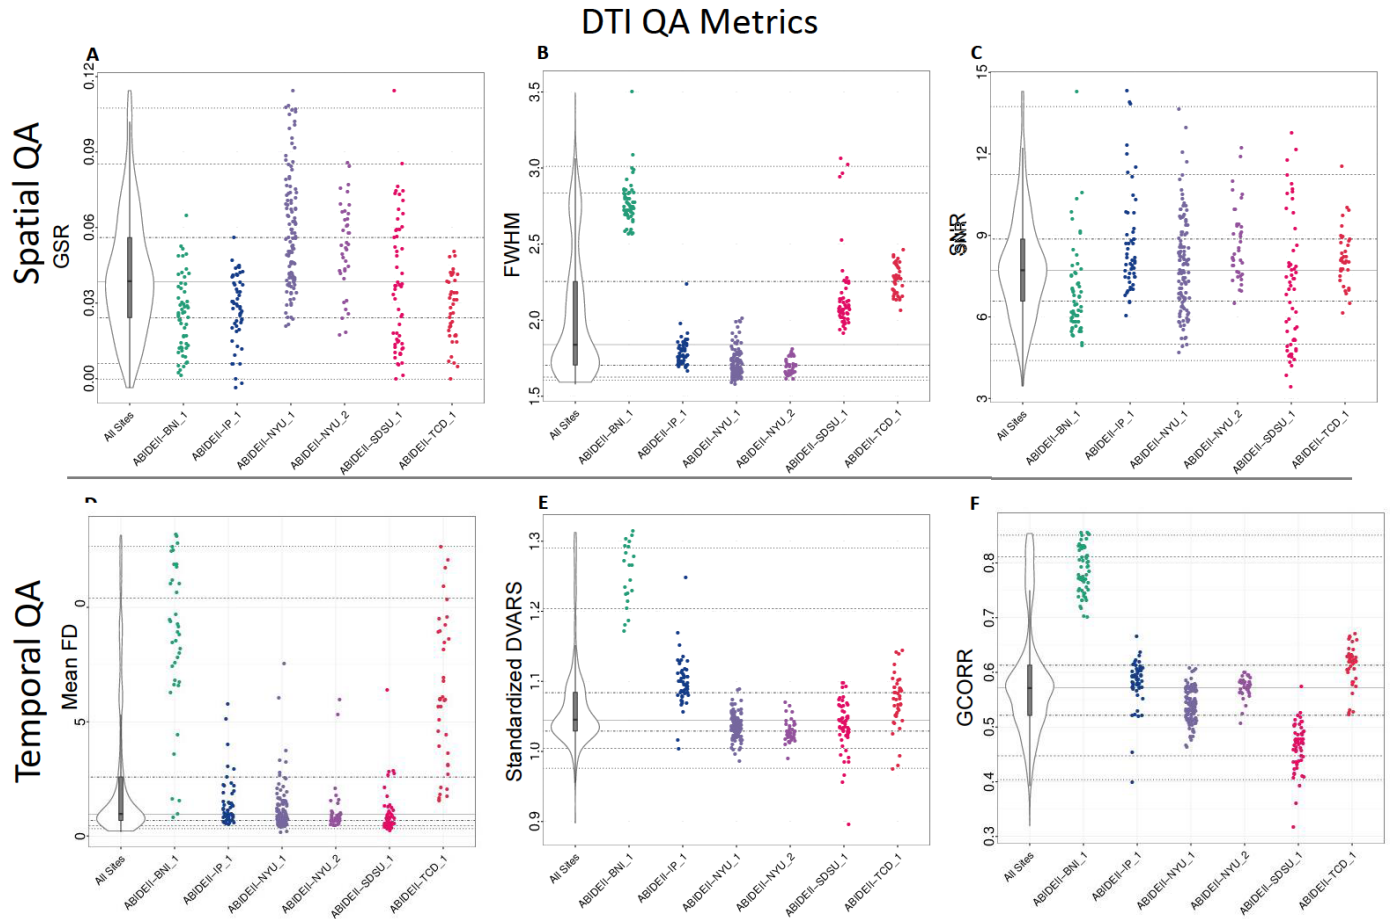

**Supplementary Figure 1. Selection of spatial and temporal quality metrics for the diffusion weighted imaging released for six data collections of ABIDE II.** Spatial metrics include: (A) Ghost to single ratio (GSR)<sup>64</sup>; (B) smoothness of voxels indexed as full-width half maximum (FWHM)<sup>63</sup>, (C) signal-to-noise ratio (SNR)<sup>50</sup>. Temporal metrics are: (D) mean framewise displacement<sup>52</sup>; standardized DVARS<sup>65</sup>, and global correlation (GCORR)<sup>67</sup> - See Table 5 for details on this and the other quality metrics released. The colored scatterplots illustrate the quality metrics distribution for spatial MRI dataset within a given ADBIE II collection (17 cross-sectional and 2 longitudinal collections). The black and white violin plots represent a kernel density estimation of the distribution across all datasets for each quality metrics with its midline thick gray line representing the value that occurs most commonly in the

distribution. For each plot, the horizontal gray lines mark the 1<sup>st</sup>, 5<sup>th</sup>, 25<sup>th</sup>, 50<sup>th</sup> (solid gray line), 75<sup>th</sup>, 95<sup>th</sup> and 99<sup>th</sup> percentiles starting from the bottom.

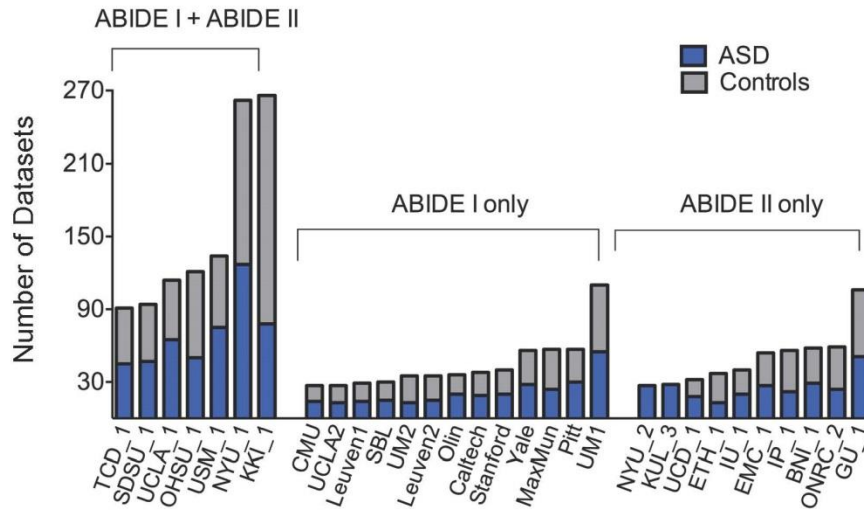

**Supplementary Figure 2. Illustration of individual cross-sectional data collections available across ABIDE I and II** (N=27 collections, N=2156 datasets across 23 institutions). Seven collections in ABIDE II represents additions of unique datasets to collections originally shared in ABIDE I; their combination yields a common multisite cross-sectional aggregate of 1082 datasets (n=487 ASD; n=595 controls). The remaining collections are independent between the two ABIDE initiatives and include 13 ABIDE I cross-sectional collections (n=280 ASD; n=297 controls) and seven new cross-sectional collections in ABIDE II (n=259 ASD; n=238 controls). These datasets can be combined or split for large-scale discovery and/or replication efforts.

| Collection Label | Contributing Institutions                   | Principal Investigator(s) and Key Contributor(s)                                                                                                                                                                                                               |
|------------------|---------------------------------------------|----------------------------------------------------------------------------------------------------------------------------------------------------------------------------------------------------------------------------------------------------------------|
| ABIDEII-BNI_1    | Barrow Neurological Institute               | Leslie Baxter, B Blair Braden, Christopher Smith                                                                                                                                                                                                               |
| ABIDEII-EMC_1    | Erasmus University Medical Center Rotterdam | Tonya White, Laura Blanken, Ryan Muetzel, Henning Tiemeier, Frank Verhulst                                                                                                                                                                                     |
| ABIDEII-ETH_1    | ETH Zurich                                  | Nicole Wenderoth, Joshua Balsters                                                                                                                                                                                                                              |
| ABIDEII-GU_1     | Georgetown University                       | Chandan Vaidya, Lauren Kenworthy                                                                                                                                                                                                                               |
| ABIDEII-IU_1     | Indiana University                          | Daniel Kennedy, Lisa Byrge                                                                                                                                                                                                                                     |
| ABIDEII-IP_1     | Institute Pasteur & Robert Debré Hospital   | Richard Delorme, Anita Beggato, Roberto Toro, Monique Elmaleh, Marianne Alison, David Germanaud                                                                                                                                                                |
| ABIDEII-KKI_1    | Kennedy Krieger Institute                   | Stewart Mostofsky, Mary Beth Nebel                                                                                                                                                                                                                             |
| ABIDEII-KUL_3    | KU Leuven                                   | Kaat Alaerts, Claudia Dillen, Sylvie Bernaerts, Jellina Prinsen                                                                                                                                                                                                |
| ABIDEII-NYU_1    | NYU Langone Medical Center: Sample 1        | Adriana Di Martino, F. X. Castellanos, Michael P Milham, Clare Kelly                                                                                                                                                                                           |
| ABIDEII-NYU_2    | NYU Langone Medical Center: Sample 2        | Adriana Di Martino, F. X. Castellanos, Michael P Milham                                                                                                                                                                                                        |
| ABIDEII-ONRC_2   | Olin Institute of Living Hartford           | Michal Assaf                                                                                                                                                                                                                                                   |
| ABIDEII-OHSU_1   | Oregon Health and Science Univeristy        | Damien Fair, Joel Nigg, Eric Fombonne                                                                                                                                                                                                                          |
| ABIDEII-SDSU_1   | San Diego State University                  | Ralph-Axel Müller, Inna Fishman, R Joanne Jao Keehn                                                                                                                                                                                                            |
| ABIDEII-TCD_1    | Trinity Centre for Health and Sciences      | Louise Gallagher, Jane McGrath, Jacqueline Fitzgerald                                                                                                                                                                                                          |
| ABIDEII-UCD_1    | University of California Davis              | Marjorie Solomon                                                                                                                                                                                                                                               |
| ABIDEII-UCLA_1   | University of California Los Angeles        | Mirella Dapretto, Susan Bookheimer                                                                                                                                                                                                                             |
| ABIDEII-USM_1    | University of Utah School of Medicine       | Jeffrey Anderson, Jared Nielsen, Alyson Froehlich, Molly DuBray, Michael Ferguson, Jason Druzgal, Annahir Cariello, Jason Cooperrider, Brandon Zielinski, Caitlin Ravichandran, Thomas Fletcher, Andrew Alexander, Erin Bigler, Nicholas Lange, Janet Lainhart |
| UPSM_Long        | Univeristy of Pittsburgh                    | Kirsten O'Hearn, Beatriz Luna                                                                                                                                                                                                                                  |
| UCLA_Long        | University of California Los Angeles        | Mirella Dapretto, Susan Y. Bookheimer                                                                                                                                                                                                                          |

**Supplementary Table 1:** Information on the institutions contributing to ABIDE II primary data collections (i.e., one time point datasets collected from individuals not previously included in ABIDE I) and longitudinal collections (i.e., providing longitudinal MRI data of individuals contributed in ABIDE I).

| Data collection  |     | Phenotype |            |       |                        |       |                     |       |                   |       |                        |       |                 |     |           |                                                                                                                                                                |       |
|------------------|-----|-----------|------------|-------|------------------------|-------|---------------------|-------|-------------------|-------|------------------------|-------|-----------------|-----|-----------|----------------------------------------------------------------------------------------------------------------------------------------------------------------|-------|
| Code             | IQ* |           | Handedness |       | ADOS* <sup>15,16</sup> |       | ADI-R <sup>17</sup> |       | SRS <sup>18</sup> |       | RBS-R <sup>19,20</sup> |       | ASD Comorbidity |     | Meds Info |                                                                                                                                                                | Other |
|                  | ASD | Contr     | ASD        | Contr | ASD                    | Contr | ASD                 | Contr | ASD               | Contr | ASD                    | Contr | ASD             | ASD | Contr     | ASD                                                                                                                                                            |       |
| ABIDEII-BNI_1    | 29  | 29        | 29         | 29    | 29                     | 0     | 0                   | 0     | 28                | 29    | 20                     | 0     | 0               | 29  | 29        | <i>BDI<sup>1</sup></i>                                                                                                                                         |       |
| ABIDEII-EMC_1    | 24  | 25        | 27         | 27    | 0                      | 0     | 0                   | 0     | 0                 | 0     | 0                      | 0     | 27              | 27  | 27        | -                                                                                                                                                              |       |
| ABIDEII-ETH_1    | 13  | 24        | 13         | 24    | 12                     | 0     | 12                  | 0     | 11                | 22    | 0                      | 0     | 0               | 0   | 0         | SCQ <sup>2</sup>                                                                                                                                               |       |
| ABIDEII-GU_1     | 50  | 54        | 51         | 55    | 51                     | 0     | 49                  | 0     | 51                | 55    | 0                      | 0     | 0               | 51  | 55        | <i>BRIEF<sup>3</sup>, CASI<sup>4</sup>, CBCL<sup>5</sup>, CSI<sup>6</sup>, MASC<sup>7</sup></i>                                                                |       |
| ABIDEII-IU_1     | 20  | 20        | 20         | 20    | 20                     | 0     | 0                   | 0     | 15                | 11    | 0                      | 0     | 0               | 0   | 0         | <i>AQ<sup>8</sup>, BDI<sup>1</sup></i>                                                                                                                         |       |
| ABIDEII-IP_1     | 22  | 34        | 22         | 34    | 22                     | 0     | 12                  | 0     | 0                 | 0     | 14                     | 19    | 22              | 22  | 34        | -                                                                                                                                                              |       |
| ABIDEII-KKI_1    | 56  | 155       | 56         | 155   | 56                     | 0     | 55                  | 0     | 52                | 148   | 51                     | 139   | 56              | 53  | 152       | <i>BASC<sup>9</sup>, BRIEF<sup>3</sup>, CBCL<sup>5</sup></i>                                                                                                   |       |
| ABIDEII-KUL_3*** | 28  | 0         | 28         | 0     | 28                     | 0     | 0                   | 0     | 28                | 0     | 27                     | 0     | 27              | 28  | 0         | -                                                                                                                                                              |       |
| ABIDEII-NYU_1    | 47  | 30        | 37         | 29    | 48                     | 0     | 45                  | 0     | 48                | 28    | 9                      | 11    | 48              | 48  | 30        | <i>AQ<sup>8</sup>, BRIEF<sup>3</sup>, CBCL<sup>5</sup>, CPRS-R:LV<sup>10</sup>, MASC<sup>7</sup>, SCQ<sup>2</sup>, VABS-II<sup>11</sup>, WIAT<sup>12</sup></i> |       |
| ABIDEII-NYU_2*** | 27  | 0         | 25         | 0     | 27                     | 0     | 27                  | 0     | 27                | 0     | 24                     | 0     | 27              | 27  | 0         | <i>BRIEF<sup>3</sup>, CBCL<sup>5</sup>, CPRS-R:LS<sup>10</sup>, MASC<sup>7</sup>, SCQ<sup>2</sup>, VABS-II<sup>11</sup>, WIAT<sup>12</sup></i>                 |       |
| ABIDEII-ONRC_2   | 24  | 35        | 24         | 35    | 23                     | 35    | 11                  | 0     | 0                 | 0     | 0                      | 0     | 24              | 24  | 35        | <i>BDI<sup>1</sup></i>                                                                                                                                         |       |
| ABIDEII-OHSU_1   | 37  | 56        | 37         | 56    | 37                     | 2     | 37                  | 0     | 33                | 46    | 0                      | 0     | 32              | 37  | 56        | <i>MASC<sup>7</sup>, SCQ<sup>2</sup></i>                                                                                                                       |       |
| ABIDEII-SDSU_1   | 33  | 25        | 33         | 24    | 33                     | 0     | 33                  | 0     | 32                | 25    | 33                     | 25    | 0               | 33  | 25        | <i>BRIEF<sup>2</sup>, CELF<sup>13</sup>, SCQ<sup>2</sup>, VMI<sup>14</sup></i>                                                                                 |       |
| ABIDEII-TCD_1    | 21  | 21        | 21         | 21    | 21                     | 0     | 21                  | 0     | 21                | 21    | 21                     | 0     | 0               | 21  | 21        | <i>CBCL<sup>5</sup>, SCQ<sup>2</sup></i>                                                                                                                       |       |
| ABIDEII-UCD_1    | 18  | 14        | 18         | 14    | 18                     | 0     | 0                   | 0     | 18                | 14    | 18                     | 14    | 18              | 18  | 14        | <i>BASC<sup>9</sup>, SCQ<sup>2</sup></i>                                                                                                                       |       |
| ABIDEII-UCLA_1   | 16  | 14        | 16         | 16    | 16                     | 0     | 0                   | 0     | 0                 | 0     | 0                      | 0     | 0               | 16  | 14        | -                                                                                                                                                              |       |
| ABIDEII-USM_1    | 17  | 15        | 15         | 10    | 12                     | 11    | 0                   | 0     | 14                | 8     | 0                      | 0     | 0               | 14  | 7         | -                                                                                                                                                              |       |
|                  | 482 | 551       | 472        | 549   | 453                    | 48    | 302                 | 0     | 378               | 407   | 217                    | 208   | 281             | 448 | 499       | -                                                                                                                                                              |       |

**Supplementary Table 2:** Counts of available phenotypic measures in each primary ABIDE II data collection (i.e., collections from individuals not included in ABIDE I). Counts are only for measures shared across at least 50% (n=8) of the collections; the remaining measures available are listed in the column labeled Other (measures of psychopathology are in italic). Age and sex are available for all data available, plotted in Figure 1 and summarized by diagnostic group in Supplementary Table 4. \*Any IQ indices (i.e., full, verbal or performance IQ; data records provide information on the standard IQ test utilized); \*\*: 8 data collections shared the Autism Diagnostic Observation Schedule - Second Edition (ADOS-2) calibrated severity scores (see Figure 1E); 14 collections shared the ADOS-G scaled scores. \*\*\* These data collections include only data from individuals with ASD. ADI-R: Autism Diagnostic

Interview-Revised; ASD: Autism Spectrum Disorder; AQ: Autism Quotient; BASC: Behavior Assessment System for Children; BDI: Beck Depression Inventory; BRIEF: Behavior Rating Inventory of Executive Function; CASI: Child and Adolescent Symptom Inventory; CBCL: Child Behavior Checklist; CELF: Clinical Evaluation of Language Fundamentals; CSI: Child Symptom Inventory; CPRS-R:LV: Conners' Parent Rating Scale-Revised; Long Version; MASC: Multidimensional Anxiety Scale for Children; Meds info: use of medication within three months from scan; RBS-R: Repetitive Behavior Scale Revised; SCQ: Social Communication Questionnaire; SRS: Social Responsiveness Scale; VABS-II: Vineland Adaptive Behavior Scale, Second Edition; VMI: Beery-Buktenica Developmental Test of Visual-Motor Integration; WIAT: Wechsler Individual Achievement Test. See Supplementary text for reference of the instruments listed here.

| Collection code | N          |            | Females n (%)  |                 | Age Range M ± SD |               |             |                | *IQ Range M ± SD |                 |               |                 | Handedness n R:L:M |                  |
|-----------------|------------|------------|----------------|-----------------|------------------|---------------|-------------|----------------|------------------|-----------------|---------------|-----------------|--------------------|------------------|
|                 | ASD        | TC         | ASD            | TC              | ASD              | TC            | ASD         | TC             | ASD              | TC              | ASD           | TC              | ASD                | TC               |
| ABIDEII-BNI_1   | 29         | 29         | 0              | 0               | 18-62            | 38 ± 16       | 18-64       | 40 ± 15        | 85-139           | 108 ± 13        | 89-141        | 112 ± 12        | 29:0:0             | 29:0:0           |
| ABIDEII-EMC_1   | 27         | 27         | 5 (19)         | 5 (19)          | 6-11             | 8 ± 1         | 6-10        | 8 ± 1          | 67-122           | 98±15           | 71-135        | 99±16           | 22:5:0             | 21:6:0           |
| ABIDEII-ETH_1   | 13         | 24         | 0              | 0               | 15-27            | 20 ± 3        | 14-31       | 24 ± 4         | 82-123           | 109 ± 13        | 100-133       | 117 ± 9         | 13:0:0             | 13:0:0           |
| ABIDEII-GU_1    | 51         | 55         | 8 (16)         | 27 (49)         | 8-14             | 11 ± 2        | 8-14        | 10 ± 2         | 90-149           | 118 ± 15        | 91-149        | 121 ± 14        | 43:8:0             | 52:3:0           |
| ABIDEII-IU_1    | 20         | 20         | 4 (20)         | 5 (25)          | 17-54            | 25 ± 9        | 19-37       | 24 ± 5         | 80-132           | 116 ± 12        | 94-135        | 117 ± 10        | 15:2:3             | 17:1:2           |
| ABIDEII-IP_1    | 22         | 34         | 8 (36)         | 22 (65)         | 6-27             | 15 ± 5        | 8-47        | 23 ± 12        | 49-125           | 92 ± 24         | 71-125        | 106 ± 17        | 21:1:0             | 27:5:2           |
| ABIDEII-KKI_1   | 56         | 155        | 15 (27)        | 56 (36)         | 8-13             | 10 ± 2        | 8-13        | 10 ± 1         | 63-132           | 103 ± 16        | 85-143        | 114 ± 11        | 46:2:8             | 133:10:12        |
| ABIDEII-KUL_3** | 28         | 0          | 0              | 0               | 18-35            | 24 ± 5        | NA          | NA             | 73-146           | 107 ± 16        | NA            | NA              | 22:6:0             | NA               |
| ABIDEII-NYU_1   | 48         | 30         | 5 (10)         | 2 (7)           | 5-35             | 10 ± 6        | 6-24        | 10 ± 3         | 67-138           | 102 ± 18        | 91-144        | 116 ± 15        | 27:2:8             | 28:0:1           |
| ABIDEII-NYU_2** | 27         | 0          | 3 (11)         | 0               | 5-9              | 7 ± 1         | NA          | NA             | 82-143           | 107 ± 14        | NA            | NA              | 14:4:7             | NA               |
| ABIDEII-ONRC_2  | 24         | 35         | 4 (17)         | 15 (43)         | 18-31            | 22 ± 4        | 18-30       | 24 ± 4         | 80-146           | 114 ± 16        | 85-146        | 111 ± 13        | 16:4:4             | 32:0:3           |
| ABIDEII-OHSU_1  | 37         | 56         | 7 (19)         | 29 (52)         | 7-15             | 12 ± 2        | 8-14        | 10 ± 2         | 72-136           | 106 ± 17        | 90-140        | 117 ± 12        | 35:1:1             | 55:0:1           |
| ABIDEII-SDSU_1  | 33         | 25         | 7 (21)         | 2 (8)           | 7-18             | 13 ± 3        | 8-18        | 13 ± 3         | 66-130           | 100 ± 15        | 79-125        | 103 ± 11        | 27:4:2             | 20:1:3           |
| ABIDEII-TCD_1   | 21         | 21         | 0              | 0               | 10-20            | 15 ± 3        | 10-20       | 16 ± 3         | 79-139           | 109 ± 15        | 81-142        | 118 ± 13        | 21:0:0             | 21:0:0           |
| ABIDEII-UCD_1   | 18         | 14         | 4 (22)         | 4 (28)          | 12-18            | 15 ± 2        | 12-17       | 15 ± 2         | 83-130           | 103 ± 12        | 92-128        | 113 ± 11        | 17:0:1             | 14:0:0           |
| ABIDEII-UCLA_1  | 16         | 16         | 1 (6)          | 5 (31)          | 8-15             | 12 ± 2        | 8-14        | 10 ± 2         | 78-124           | 102 ± 14        | 94-141        | 115 ± 13        | 14:2:0             | 14:1:1           |
| ABIDEII-USM_1   | 17         | 16         | 2 (12)         | 3 (19)          | 9-39             | 18 ± 7        | 12-36       | 24 ± 8         | 73-134           | 99 ± 19         | 86-144        | 115 ± 16        | 13:0:2             | 9:0:1            |
|                 | <b>487</b> | <b>557</b> | <b>73 (15)</b> | <b>175 (31)</b> | <b>5-62</b>      | <b>15 ± 9</b> | <b>6-64</b> | <b>15 ± 10</b> | <b>49-149</b>    | <b>107 ± 17</b> | <b>71-149</b> | <b>115 ± 13</b> | <b>395:41:36</b>   | <b>485:27:26</b> |

**Supplementary Table 3: Basic statistics (i.e., minimum, maximum, mean and standard deviation) of key phenotypic information in each primary ABIDE II data collection by diagnostic group. \*: Full IQ is reported for all collections but EMC\_1 for which Performance IQ scores are available. \*\*: These data collections include only data from individuals with ASD. ASD: Autism Spectrum Disorder; Handedness R: Right handed (defined as primarily using their right hand to perform all tasks; scores ≥ +50); L: Left handed (defined as primarily using their left hand to perform all tasks; scores ≤ -50); M: Mixed handed (change of hand preferences in different tasks; scores between -50 and 50); M ± SD: Mean ± Standard Deviation; NA: not applicable.**

## Supplementary Material Citations

- 1 Beck, A. T., Steer, R. A. & Brown, G. K. *Beck depression inventory-II*. (Psychological Corporation, 1996).
- 2 Rutter, M., Bailey, A. & Lord, C. *The social communication questionnaire: Manual*. (Western Psychological Services, 2003).
- 3 Achenbach, T. & Rescorla, L. *Manual for the ASEBA school-age forms & profiles: an integrated system of multi-informant assessment* (University of Vermont. Research Center for Children, Youth, & Families, 2001).
- 4 Gadow, K. & Sprafkin, J. *Child and adolescent symptom inventory-4R*. (Checkmate Plus, 2005).
- 5 Achenbach, T. & Rescorla, L. *Manual for the ASEBA school-age forms & profiles: an integrated system of multi-informant assessment* (University of Vermont. Research Center for Children, Youth, & Families, 2001).
- 6 Gadow, K. D. & Sprafkin, J. N. *Child symptom inventory 4: Screening and norms manual*. (Checkmate Plus, 2002).
- 7 March, J. S., Parker, J. D., Sullivan, K., Stallings, P. & Conners, C. K. The Multidimensional Anxiety Scale for Children (MASC): factor structure, reliability, and validity. *Journal of the American Academy of Child and Adolescent Psychiatry* **36**, 554-565, doi:10.1097/00004583-199704000-00019 (1997).
- 8 Baron-Cohen, S., Wheelwright, S., Skinner, R., Martin, J. & Clubley, E. The Autism-Spectrum Quotient (AQ): Evidence from Asperger Syndrome/High-Functioning Autism, Males and Females, Scientists and Mathematicians. *Journal of autism and developmental disorders* **31**, 5-17, doi:10.1023/a:1005653411471 (2001).
- 9 Reynolds, C. R. & Kamphaus, R. W. *BASC-2: Behavior assessment system for children*. (2004).
- 10 Conners, C. K. *Conners' rating scales revised*. (Multi-Health Systems, Incorporated, 2001).
- 11 Sparrow, S. S., Cicchetti, D. V. & Balla, D. A. *Vineland II: Vineland Adaptive Behavior Scales Second Edition*. (Pearson Assessments, 2005).
- 12 Wechsler, D. *Wechsler Individual Achievement Test Second Edition Abbreviated (WIAT-II Abbreviated)*. (The Psychological Corporation, 2005).
- 13 Oldfield, R. C. The assessment and analysis of handedness: the Edinburgh inventory. *Neuropsychologia* **9**, 97-113 (1971).
- 14 Beery, K. E., & Beery, N. A. *Beery-Buktenica Developmental Test of Visual-Motor Integration - Sixth Edition*. (NCS Pearson, Inc, 2010).
- 15 Gotham, K., Risi, S., Pickles, A. & Lord, C. The Autism Diagnostic Observation Schedule: revised algorithms for improved diagnostic validity. *Journal of autism and developmental disorders* **37**, 613-627, doi:10.1007/s10803-006-0280-1 (2007).
- 16 Lord, C., Rutter, M., DiLavore, P. C. & Risi, S. *Autism diagnostic observation schedule*. (Western Psychological Services, 1999).
- 17 Lord, C., Rutter, M. & Le Couteur, A. Autism Diagnostic Interview-Revised: a revised version of a diagnostic interview for caregivers of individuals with possible pervasive developmental disorders. *Journal of autism and developmental disorders* **24**, 659-685 (1994).
- 18 Constantino, J. N. & Gruber, C. P. *Social responsiveness scale (SRS): Manual*. (Western Psychological Services, 2007).
- 19 Bodfish, J. W., Symons, F. J., Parker, D. E. & Lewis, M. H. Varieties of repetitive behavior in autism: comparisons to mental retardation. *Journal of autism and developmental disorders* **30**, 237-243 (2000).
- 20 Lam, K. S. & Aman, M. G. The Repetitive Behavior Scale-Revised: independent validation in individuals with autism spectrum disorders. *Journal of autism and developmental disorders* **37**, 855-866, doi:10.1007/s10803-006-0213-z (2007).
